# Supplementary material
Source: MDPI journal article supplement (https://www.mdpi.com/2077-0472/11/2/157)
Supplement: s1 [file s1]

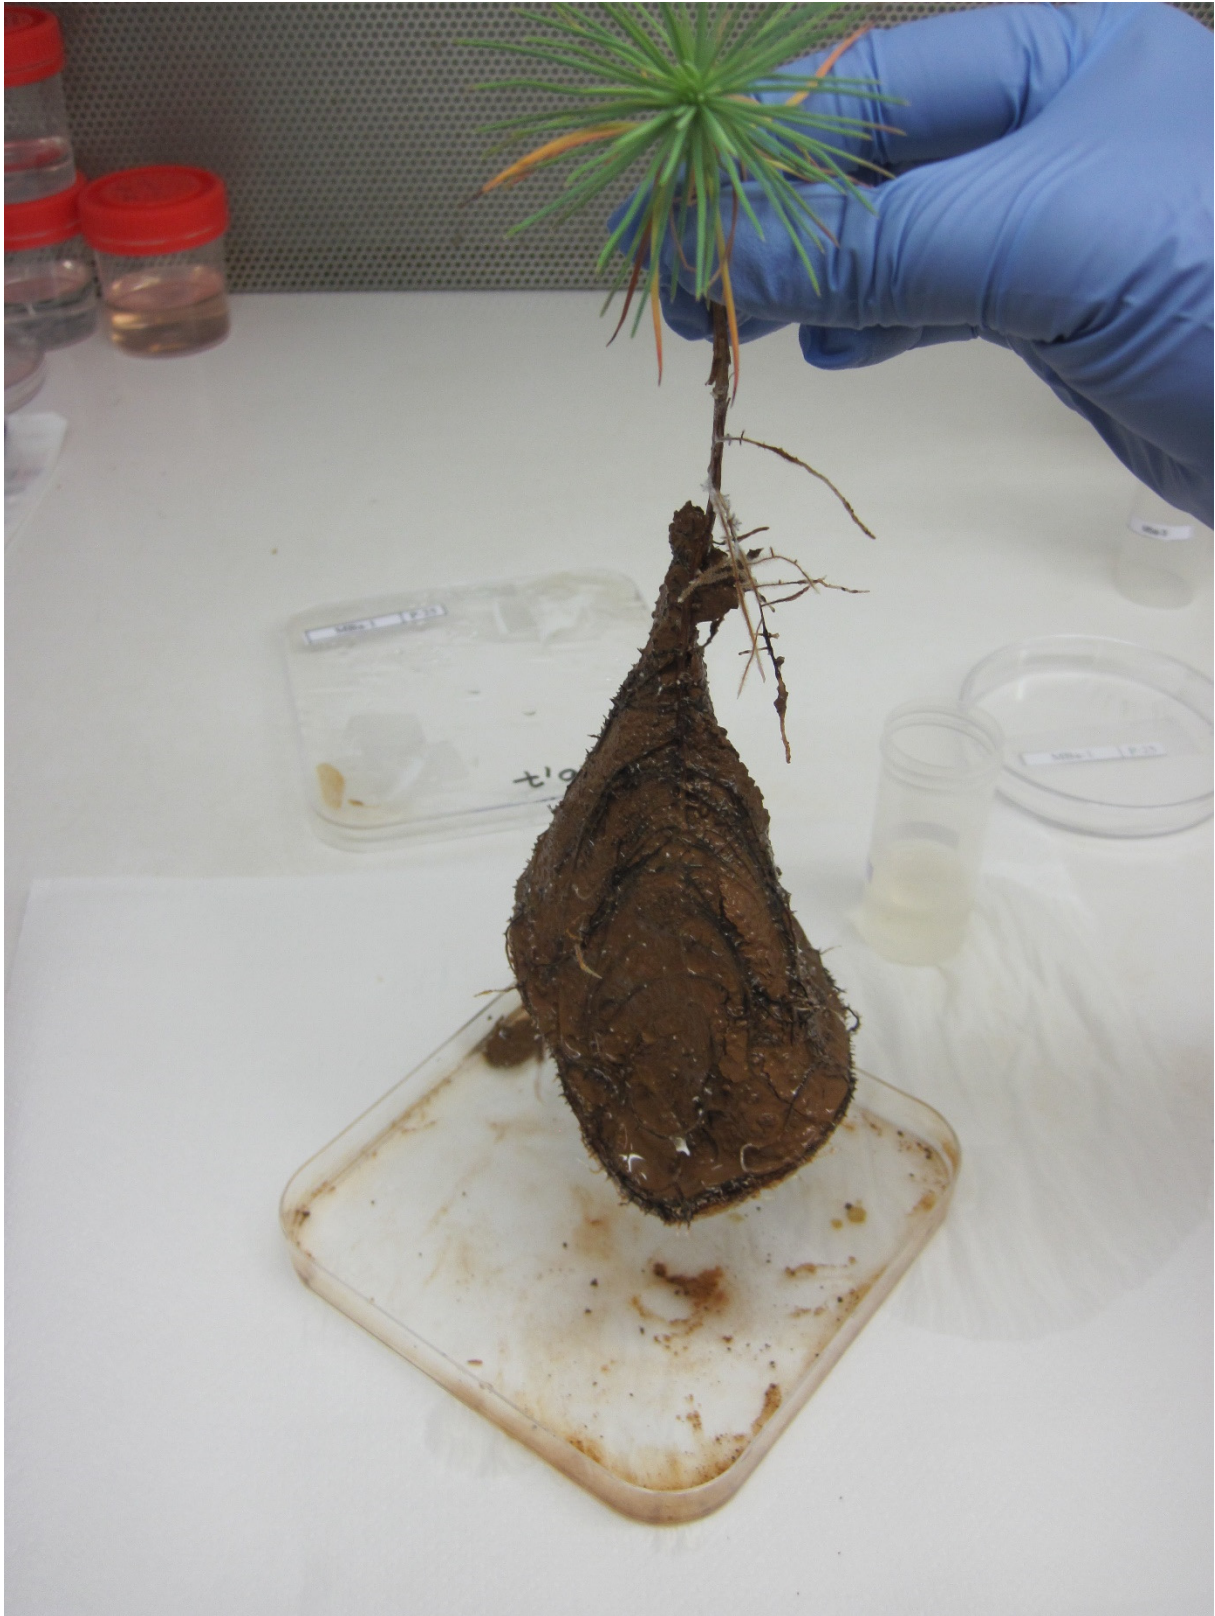

**Figure S1.** Photography of the root system from an ectomycorrhizal plant extracted from the Petri dish at the end of the experiment (experiment F). The very important development of the mycorrhizal fungus *H. cylindrosporum* in the soil-bead mixture leads to a strong aggregation of the soil around the roots of pine.

**Table S1.** Untransformed average values (SD) of plant P gain in mg-P per Petri dish according to biological treatments. Plant P gain were calculated by subtracting the mean amount of total P contained in plants at the beginning of each experiment from individual values measured at the end of the experiment. *P*-value corresponds to significant difference against 0 (Student t test).

| Experiments | Biological Treatments | Plant P gain (mg-P per Petri dish) |        | <i>P</i> -value |
|-------------|-----------------------|------------------------------------|--------|-----------------|
| A           | C                     | 0.00                               | (0.18) | NS              |
| A           | B                     | 0.00                               | (0.14) | NS              |
| A           | B+N                   | 0.00                               | (0.09) | NS              |
| A           | M                     | 0.06                               | (0.13) | NS              |
| A           | B+M                   | 0.05                               | (0.14) | NS              |
| A           | B+N+M                 | 0.03                               | (0.18) | NS              |
| B           | C                     | 0.34                               | (0.15) | **              |
| B           | B                     | 0.44                               | (0.23) | **              |
| B           | B+N                   | 1.07                               | (0.11) | ***             |
| B           | M                     | 0.34                               | (0.26) | *               |
| B           | B+M                   | 0.46                               | (0.12) | **              |
| B           | B+N+M                 | 0.56                               | (0.07) | ***             |
| C           | C                     | 0.47                               | (0.12) | **              |
| C           | B                     | 0.60                               | (0.17) | ***             |
| C           | B+N                   | 0.72                               | (0.26) | ***             |
| C           | M                     | 0.34                               | (0.27) | **              |
| C           | B+M                   | 0.48                               | (0.09) | ***             |
| C           | B+N+M                 | 0.48                               | (0.22) | ***             |
| D           | C                     | 0.06                               | (0.08) | NS              |
| D           | B                     | 0.11                               | (0.08) | *               |
| D           | B+N                   | 0.08                               | (0.07) | *               |
| D           | M                     | 0.12                               | (0.07) | **              |
| D           | B+M                   | 0.10                               | (0.09) | *               |
| D           | B+N+M                 | 0.18                               | (0.04) | ***             |
| E           | C                     | 0.31                               | (0.21) | *               |
| E           | B                     | 0.20                               | (0.20) | NS              |
| E           | B+N                   | 0.82                               | (0.15) | ***             |
| E           | M                     | 0.02                               | (0.05) | NS              |
| E           | B+M                   | 0.22                               | (0.20) | NS              |
| E           | B+N+M                 | 0.44                               | (0.24) | **              |
| F           | C                     | 0.07                               | (0.09) | NS              |
| F           | B                     | 0.09                               | (0.12) | NS              |
| F           | B+N                   | 0.64                               | (0.10) | ***             |
| F           | M                     | 0.27                               | (0.12) | **              |
| F           | B+M                   | 0.55                               | (0.16) | **              |
| F           | B+N+M                 | 0.69                               | (0.14) | ***             |

**Table S2.** Fitting parameters ( $R^2$ , P-value) for each experiment with linear (additive hypothesis) or polynomial (non-additive hypothesis) models.

| Experiments |                | Models           |                  |                                    |
|-------------|----------------|------------------|------------------|------------------------------------|
|             |                | Linear           | Polynomial       | <i>Anova between fitted models</i> |
| A           | $R^2$          | 0.02             | 0.02             | 0.774                              |
|             | <i>P-value</i> | 0.359            | 0.634            |                                    |
| B           | $R^2$          | 0.01             | 0.05             | 0.234                              |
|             | <i>P-value</i> | 0.745            | 0.462            |                                    |
| C           | $R^2$          | <b>0.15</b>      | <b>0.22</b>      | 0.147                              |
|             | <i>P-value</i> | <b>0.029</b>     | <b>0.031</b>     |                                    |
| D           | $R^2$          | <b>0.09</b>      | 0.06             | 0.642                              |
|             | <i>P-value</i> | <b>0.042</b>     | 0.117            |                                    |
| E           | $R^2$          | <b>0.14</b>      | <b>0.17</b>      | 0.324                              |
|             | <i>P-value</i> | <b>0.019</b>     | <b>0.042</b>     |                                    |
| F           | $R^2$          | <b>0.70</b>      | <b>0.69</b>      | 0.822                              |
|             | <i>P-value</i> | <b>&lt;0.001</b> | <b>&lt;0.001</b> |                                    |
